# Supplementary material for: Intra-octahedral distortion on lamellar potassium niobate K4Nb6O17: a periodic DFT study of structural, electronic and vibrational properties
Source: Royal Society of Chemistry journal article supplement (doi:10.1039/d0cp01581d), 2020-01-01
Supplement: d0cp01581d1.pdf [file d0cp01581d1.pdf]

## Supporting Information

# Intra-octahedral distortion on lamellar potassium niobate $K_4Nb_6O_{17}$ : a periodic DFT study of structural, electronic and vibrational properties

Juliana K. D. Souza,<sup>†</sup> Thiago M. Duarte,<sup>†</sup> Ieda M. G. Santos,<sup>†</sup> Julio R.

Sambrano,<sup>‡</sup> Ary S. Maia,<sup>†</sup> and Anderson R. Albuquerque\*,<sup>¶</sup>

<sup>†</sup>*NPE-Lacom, Universidade Federal da Paraíba, CEP 58051-900, João Pessoa, PB, Brazil*

<sup>‡</sup>*Grupo de Modelagem e Simulação Molecular, UNESP, São Paulo State University, CEP  
17033-360, Bauru, SP, Brazil*

<sup>¶</sup>*Institute of Chemistry, Universidade Federal do Rio Grande do Norte, UFRN, CEP  
59078-970, Natal, RN, Brazil*

E-mail: andersonreisalbuquerque@gmail.com

Phone: +55 (84) 3211-9224 (173)

# 1 Band Structure

Figure 1 shows the electronic band structure of  $K_4Nb_6O_{17}$  at the B3LYP-D3 level.

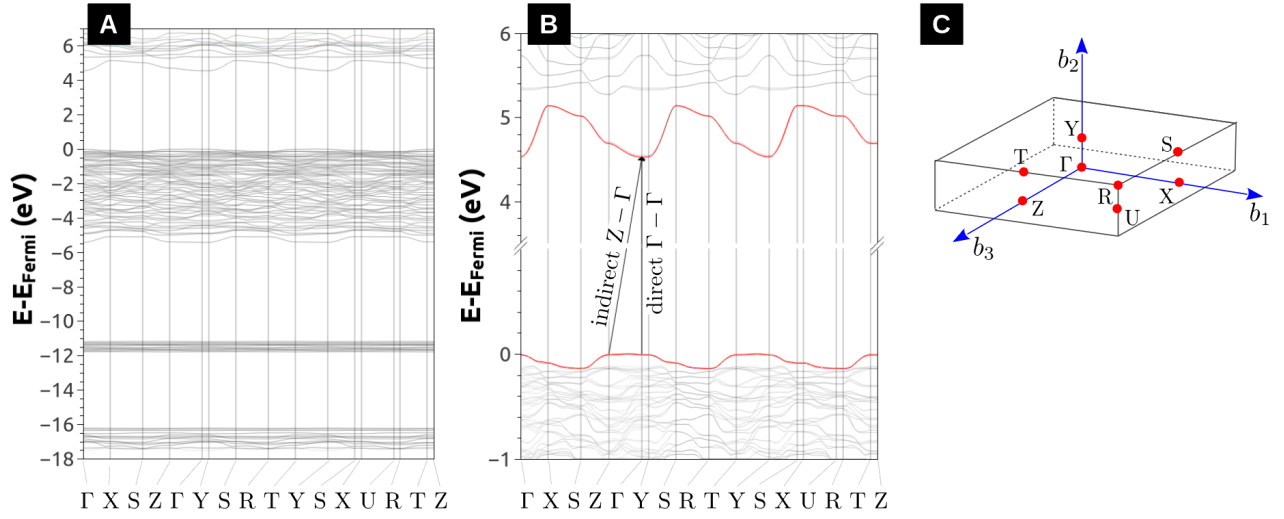

Figure 1: (a) Electronic band structure of  $K_4Nb_6O_{17}$ . (b) The top of valence band and the bottom of conduction band are shown in red. (c) The Brillouin zone for the orthorhombic cell with high-symmetry points.

## 2 Charge Density Isosurface

Figure 2 and 3 show the isosurface of electrostatic potential colored with the charge density and Hirshfeld-I charges at the B3LYP-D3 level.

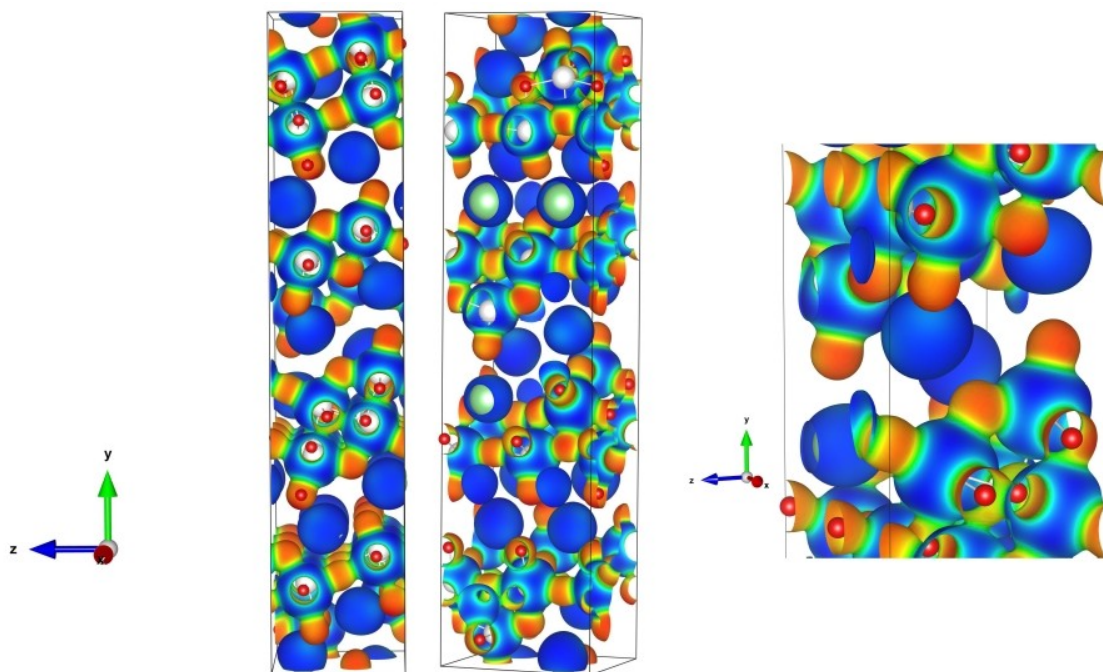

Figure 2: Charge density distribution on electrostatic 3D potential isosurface of  $K_4Nb_6O_{17}$  unit cell. Red color denotes negative charge density (high values on oxygens), and blue regions denotes positive charges. Isosurfaces of  $0.25 |e| \cdot bohr^{-3}$ .

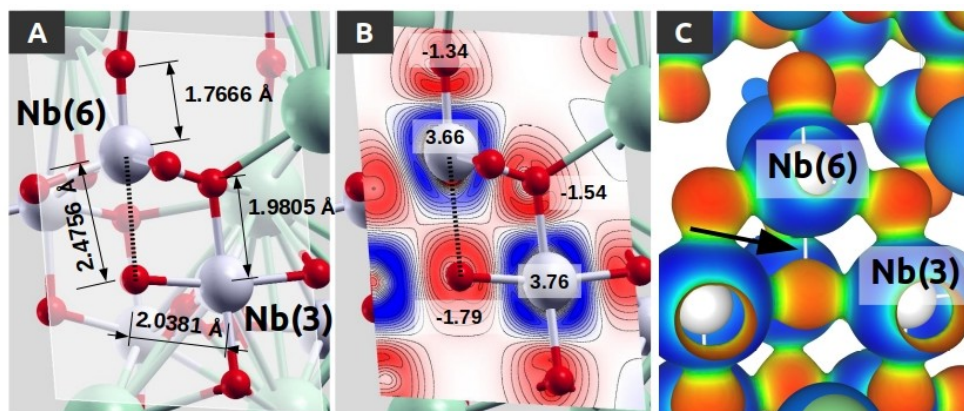

Figure 3: Highly distorted  $[Nb(6)O_6]$  polyhedron, focusing on shortest and longest Nb-O bond of  $K_4Nb_6O_{17}$  structure. (a) Bond length. (b) Hirshfeld-I charges and charge density map (2D) (isolines  $0.05 |e| \cdot bohr^{-2}$ ). (c) Charge density surface (isosurface  $0.25 |e| \cdot bohr^{-3}$ ).

### 3 Equations for Mean Deviation of Lattice Parameters

The equations used to obtain the mean deviation of calculated lattice parameters  $\nu_i$  from different DFT functionals (Table 1 of main text) were:

$$\overline{|\Delta|} = \frac{1}{N} \sum_{i=1}^N |\nu_i^{cal} - \nu_i^{exp}| \quad (1)$$

$$\overline{|\Delta|}\% = \frac{100}{N} \sum_{i=1}^N \left| \frac{\nu_i^{cal} - \nu_i^{exp}}{\nu_i^{exp}} \right| \quad (2)$$

$$|\Delta_{max}| = max(|\nu_i^{cal} - \nu_i^{exp}|) \quad (3)$$

where  $N$  is the number of different lattice parameters.

## 4 Descriptors for Structural Distortion

### 4.1 Distortion Index

The distortion index ( $D$ ) is defined in relation to bond length:

$$D = \frac{1}{n} \sum_{i=1}^n \frac{|d_i - \bar{d}|}{\bar{d}} \quad (4)$$

where  $d_i$  is the Nb-O distance, and  $\bar{d}$  is the average of intra-polyhedra bond length.

### 4.2 Effective Coordination Number, ECoN

The effective coordination number (ECoN) is a number, not necessarily an integer value, that denotes the amount of bonded atoms around the central cation. The weight ( $0 < w_i < 1$ ) to ECoN accounts the distance of each atom ( $d_i$ ) in relation to the mean distance of Nb and O on  $[\text{NbO}_6]$ .

$$ECoN = \sum_i w_i = \sum_i \exp \left[ 1 - \left( \frac{d_i}{d_{av}} \right)^6 \right] \quad (5)$$

$$d_{av} = \frac{\sum_i d_i \exp \left[ 1 - \left( \frac{d_i}{d_{min}} \right)^6 \right]}{\sum_i \exp \left[ 1 - \left( \frac{d_i}{d_{min}} \right)^6 \right]} \quad (6)$$

where the shortest bond length is  $d_{min}$  and averaged bond length is  $d_{av}$ .

#### 4.2.1 Quadratic Elongation, $\langle \lambda \rangle$

The quadratic elongation ( $\langle \lambda \rangle$ ) is a dimensionless descriptor that measures the displacement ( $l_i$ ) of the central atom toward the  $n$  vertices of a polyhedron with respect to a regular polyhedron with the same volume (length  $l_0$ ), and is independent of the size of the polyhedron analyzed:

$$\langle \lambda \rangle = \frac{1}{n} \sum_{i=1}^n \left( \frac{l_i}{l_0} \right)^2 \quad (7)$$

#### 4.2.2 Internal bond angle variation, $\sigma^2$

Finally, the variation of the internal angles ( $\phi$ ) are calculated in comparison to the regular polyhedron of the same number of sides ( $m$ ):

$$\sigma^2 = \frac{1}{m-1} \sum_{i=1}^m (\phi_i - \phi_0)^2 \quad (8)$$

## 5 Structural parameters from literature

Table 1: Structural descriptors for Nb polyhedra from experimental cif file [ref.6], where  $V[\text{NbO}_6]$  is the  $[\text{NbO}_6]_d/\text{\AA}^3$  volume, ECoN is the effective coordination number,  $d_{min}$  and  $d_{max}$  are the minima and maxima intraoctahedral Nb-O bond length,  $\bar{d}_{(\text{Nb}-\text{O})}/\text{\AA}$  is the average bond length inside  $[\text{NbO}_6]_d$ ,  $\langle \lambda \rangle$  is the quadratic elongation,  $D$  is the distortion index and  $\sigma^2$  is the internal  $\widehat{\text{ONbO}}$  bond angle variation.

| Parameter                        | Nb(1) | Nb(3)  | Nb(5)  | Nb(6)  |
|----------------------------------|-------|--------|--------|--------|
| $V[\text{NbO}_6]$                | 9.999 | 10.385 | 10.095 | 11.094 |
| ECoN                             | 3.40  | 4.63   | 4.24   | 4.50   |
| $d_{min}(\text{Nb}-\text{O})$    | 1.697 | 1.790  | 1.776  | 1.828  |
| $d_{max}(\text{Nb}-\text{O})$    | 2.252 | 2.235  | 2.268  | 2.505  |
| $\bar{d}_{(\text{Nb}-\text{O})}$ | 1.996 | 2.004  | 1.998  | 2.069  |
| $\langle \lambda \rangle$        | 1.047 | 1.027  | 1.043  | 1.053  |
| $D \times 10^{-2}$               | 6.9   | 5.2    | 6.6    | 7.2    |
| $\sigma^2$                       | 132.7 | 73.3   | 120.7  | 143.9  |

## 6 Atomic Charges

Table 2: Atomic net charge ( $q$ ) as calculated by Mulliken ( $q_{Mul}$ ) and Hirshfeld-I ( $q_{Hir}$ ) methods for  $[\text{NbO}_6]$  polyhedral site at the B3LYP-D3 level. Two oxygen position ( $O_{ap}$  and  $O_{eq}$ ) taking as reference the central Nb are displayed, with quantities given in  $|e|$ .  $[\text{Nb}(1)\text{-O}_6] \approx [\text{Nb}(2)\text{-O}_6]$ ,  $[\text{Nb}(3)\text{-O}_6] \approx [\text{Nb}(4)\text{-O}_6]$ .

| Atom                                          | $d(\text{Nb-O})$ | $q_{Hir}$ | $q_{Mul}$ | Overlap |
|-----------------------------------------------|------------------|-----------|-----------|---------|
| <b><math>[\text{Nb}(1)\text{-O}_6]</math></b> |                  |           |           |         |
| Nb(1)                                         | -                | 3.675     | 2.738     | -       |
| $O_{ap}$ short                                | 1.7815           | -1.332    | -1.086    | 0.150   |
| $O_{ap}$ long                                 | 2.3263           | -1.656    | -1.283    | 0.029   |
|                                               | 1.9354           | -1.541    | -1.209    | 0.086   |
| $O_{eq}$                                      | 1.9549           | -1.587    | -1.225    | 0.081   |
|                                               | 2.0593           | -1.696    | -1.281    | 0.057   |
|                                               | 2.1576           | -1.525    | -1.180    | 0.049   |
| <b><math>[\text{Nb}(3)\text{-O}_6]</math></b> |                  |           |           |         |
| Nb(3)                                         | -                | 3.762     | 2.782     | -       |
| $O_{ap}$ short                                | 1.8451           | -1.525    | -1.086    | 0.114   |
| $O_{ap}$ long                                 | 2.2204           | -1.656    | -1.283    | 0.044   |
|                                               | 1.9260           | -1.561    | -1.186    | 0.079   |
| $O_{eq}$                                      | 1.9805           | -1.549    | -1.219    | 0.077   |
|                                               | 2.0321           | -1.541    | -1.209    | 0.069   |
|                                               | 2.0381           | -1.790    | -1.326    | 0.055   |
| <b><math>[\text{Nb}(5)\text{-O}_6]</math></b> |                  |           |           |         |
| Nb(5)                                         | -                | 3.717     | 2.757     | -       |
| $O_{ap}$ short                                | 1.8210           | -1.528    | -1.142    | 0.117   |
| $O_{ap}$ long                                 | 2.3501           | -1.790    | -1.326    | 0.029   |
|                                               | 1.9344           | -1.562    | -1.214    | 0.085   |
| $O_{eq}$                                      | 1.9553           | -1.656    | -1.283    | 0.083   |
|                                               | 1.9553           | -1.656    | -1.283    | 0.083   |
|                                               | 2.1492           | -1.696    | -1.281    | 0.052   |
| <b><math>[\text{Nb}(6)\text{-O}_6]</math></b> |                  |           |           |         |
| Nb(6)                                         | -                | 3.660     | 2.723     | -       |
| $O_{ap}$ short                                | 1.7666           | -1.340    | -1.071    | 0.158   |
| $O_{ap}$ long                                 | 2.4756           | -1.790    | -1.326    | 0.021   |
|                                               | 1.9665           | -1.562    | -1.214    | 0.070   |
| $O_{eq}$                                      | 1.9788           | -1.549    | -1.219    | 0.076   |
|                                               | 1.9842           | -1.549    | -1.219    | 0.076   |
|                                               | 2.0429           | -1.528    | -1.142    | 0.055   |

## 7 Vibrational Modes

Table 3: Vibrational frequencies on the Infrared and Raman at the B3LYP-D3 level, and its intensities.

| Modes | Irrep | $\nu/\text{cm}^{-1}$ | Infrared Intensity |          | Raman Intensity |             |
|-------|-------|----------------------|--------------------|----------|-----------------|-------------|
|       |       |                      | Activity           | (km/mol) | Activity        | (arb.units) |
| 1     | B1    | 0.0                  | A                  | 0.0      | A               | 0.0         |
| 2     | B2    | 0.0                  | A                  | 0.0      | A               | 0.0         |
| 3     | A1    | 0.0                  | A                  | 0.0      | A               | 0.0         |
| 4     | B1    | 16.9                 | A                  | 0.0      | A               | 23.4        |
| 5     | A1    | 22.2                 | A                  | 3.9      | A               | 29.6        |
| 6     | B2    | 23.9                 | A                  | 1.1      | A               | 0.1         |
| 7     | A2    | 26.1                 | I                  | 0.0      | A               | 0.0         |
| 8     | B2    | 32.4                 | A                  | 0.0      | A               | 31.4        |
| 9     | A2    | 33.5                 | I                  | 0.0      | A               | 13.0        |
| 10    | B1    | 45.8                 | A                  | 2.9      | A               | 0.0         |
| 11    | A2    | 48.7                 | I                  | 0.0      | A               | 0.0         |
| 12    | A1    | 64.4                 | A                  | 3.3      | A               | 169.0       |
| 13    | B2    | 69.3                 | A                  | 0.0      | A               | 155.3       |
| 14    | A2    | 70.4                 | I                  | 0.0      | A               | 0.0         |
| 15    | B1    | 70.6                 | A                  | 0.2      | A               | 111.2       |
| 16    | A1    | 70.8                 | A                  | 91.5     | A               | 0.7         |
| 17    | A2    | 74.6                 | I                  | 0.0      | A               | 0.2         |
| 18    | B1    | 75.9                 | A                  | 109.2    | A               | 0.2         |
| 19    | A1    | 78.4                 | A                  | 25.5     | A               | 214.4       |
| 20    | A1    | 81.3                 | A                  | 33.9     | A               | 31.9        |
| 21    | A1    | 82.0                 | A                  | 731.9    | A               | 11.2        |



|    |    |       |   |       |   |       |
|----|----|-------|---|-------|---|-------|
| 22 | A2 | 82.0  | I | 0.0   | A | 0.0   |
| 23 | B1 | 82.9  | A | 0.0   | A | 235.0 |
| 24 | B2 | 83.0  | A | 36.5  | A | 0.0   |
| 25 | B2 | 83.2  | A | 14.3  | A | 0.0   |
| 26 | B1 | 86.2  | A | 2.2   | A | 0.0   |
| 27 | B2 | 87.0  | A | 60.4  | A | 0.0   |
| 28 | A2 | 88.3  | I | 0.0   | A | 5.1   |
| 29 | A2 | 93.0  | I | 0.0   | A | 0.0   |
| 30 | B2 | 93.7  | A | 0.2   | A | 0.9   |
| 31 | B1 | 94.6  | A | 0.2   | A | 42.9  |
| 32 | A1 | 94.7  | A | 949.0 | A | 0.3   |
| 33 | B2 | 95.3  | A | 290.0 | A | 0.0   |
| 34 | A1 | 97.9  | A | 0.1   | A | 56.1  |
| 35 | A1 | 99.4  | A | 210.3 | A | 0.1   |
| 36 | B1 | 100.3 | A | 391.4 | A | 0.1   |
| 37 | A2 | 101.3 | I | 0.0   | A | 0.1   |
| 38 | B1 | 102.3 | A | 167.4 | A | 0.6   |
| 39 | A2 | 102.4 | I | 0.0   | A | 1.2   |
| 40 | B1 | 103.1 | A | 2.6   | A | 88.0  |
| 41 | B2 | 104.4 | A | 0.0   | A | 128.4 |
| 42 | B2 | 105.8 | A | 25.0  | A | 0.1   |
| 43 | A1 | 106.1 | A | 0.0   | A | 174.6 |
| 44 | A2 | 107.3 | I | 0.0   | A | 34.5  |
| 45 | A2 | 107.8 | I | 0.0   | A | 0.2   |
| 46 | B2 | 107.8 | A | 0.0   | A | 71.9  |
| 47 | B2 | 110.1 | A | 80.6  | A | 0.0   |

---

|    |    |       |   |       |   |       |
|----|----|-------|---|-------|---|-------|
| 48 | A1 | 110.2 | A | 0.0   | A | 31.7  |
| 49 | B1 | 110.3 | A | 3.2   | A | 0.0   |
| 50 | A2 | 111.8 | I | 0.0   | A | 5.1   |
| 51 | A1 | 116.9 | A | 76.4  | A | 1.2   |
| 52 | B1 | 117.0 | A | 0.0   | A | 0.2   |
| 53 | A1 | 118.2 | A | 0.1   | A | 59.0  |
| 54 | B1 | 119.6 | A | 19.3  | A | 0.0   |
| 55 | B2 | 120.1 | A | 24.6  | A | 0.0   |
| 56 | A2 | 121.7 | I | 0.0   | A | 74.1  |
| 57 | A2 | 125.3 | I | 0.0   | A | 1.0   |
| 58 | A1 | 125.5 | A | 0.1   | A | 13.0  |
| 59 | B1 | 126.7 | A | 18.2  | A | 0.0   |
| 60 | A2 | 128.2 | I | 0.0   | A | 0.0   |
| 61 | B2 | 128.4 | A | 0.0   | A | 124.7 |
| 62 | A1 | 130.2 | A | 0.4   | A | 23.2  |
| 63 | A1 | 130.6 | A | 2.5   | A | 0.8   |
| 64 | B2 | 130.7 | A | 43.9  | A | 0.1   |
| 65 | B1 | 131.1 | A | 176.9 | A | 2.8   |
| 66 | B1 | 131.3 | A | 4.2   | A | 111.4 |
| 67 | A2 | 133.4 | I | 0.0   | A | 0.0   |
| 68 | B2 | 133.5 | A | 197.5 | A | 0.0   |
| 69 | A1 | 134.4 | A | 411.2 | A | 0.1   |
| 70 | B1 | 135.1 | A | 0.1   | A | 10.5  |
| 71 | A2 | 135.3 | I | 0.0   | A | 0.3   |
| 72 | B2 | 136.1 | A | 0.0   | A | 35.4  |
| 73 | B2 | 142.3 | A | 0.0   | A | 301.1 |

---

|    |    |       |   |        |   |       |
|----|----|-------|---|--------|---|-------|
| 74 | A2 | 142.9 | I | 0.0    | A | 0.0   |
| 75 | A1 | 144.2 | A | 39.6   | A | 0.0   |
| 76 | B1 | 145.8 | A | 0.0    | A | 13.4  |
| 77 | A1 | 146.6 | A | 2.6    | A | 209.4 |
| 78 | B1 | 148.6 | A | 27.4   | A | 0.0   |
| 79 | A2 | 148.9 | I | 0.0    | A | 16.4  |
| 80 | A1 | 149.6 | A | 6.0    | A | 10.8  |
| 81 | B2 | 149.9 | A | 15.1   | A | 0.0   |
| 82 | B1 | 159.3 | A | 3.3    | A | 0.7   |
| 83 | B1 | 159.5 | A | 0.0    | A | 55.8  |
| 84 | B2 | 159.5 | A | 83.1   | A | 0.0   |
| 85 | B2 | 160.0 | A | 0.0    | A | 2.5   |
| 86 | A2 | 160.4 | I | 0.0    | A | 0.8   |
| 87 | B1 | 163.1 | A | 7.9    | A | 0.0   |
| 88 | B2 | 164.3 | A | 125.4  | A | 0.0   |
| 89 | A1 | 164.7 | A | 0.0    | A | 74.0  |
| 90 | A2 | 166.0 | I | 0.0    | A | 19.6  |
| 91 | A1 | 166.7 | A | 112.0  | A | 0.1   |
| 92 | A2 | 166.7 | I | 0.0    | A | 0.0   |
| 93 | A1 | 167.6 | A | 0.0    | A | 37.9  |
| 94 | B2 | 174.0 | A | 450.3  | A | 0.0   |
| 95 | A2 | 174.0 | I | 0.0    | A | 49.8  |
| 96 | B1 | 176.0 | A | 9.4    | A | 0.0   |
| 97 | B1 | 179.4 | A | 0.1    | A | 239.6 |
| 98 | A1 | 180.2 | A | 7252.1 | A | 1.2   |
| 99 | B2 | 181.4 | A | 0.0    | A | 30.1  |

---

|     |    |       |   |        |   |       |
|-----|----|-------|---|--------|---|-------|
| 100 | A2 | 182.0 | I | 0.0    | A | 0.0   |
| 101 | B2 | 186.5 | A | 20.6   | A | 0.0   |
| 102 | A1 | 188.2 | A | 2.7    | A | 250.0 |
| 103 | B1 | 188.6 | A | 132.8  | A | 0.0   |
| 104 | A2 | 189.6 | I | 0.0    | A | 11.8  |
| 105 | A1 | 190.8 | A | 0.0    | A | 100.7 |
| 106 | A2 | 194.8 | I | 0.0    | A | 4.2   |
| 107 | B1 | 195.8 | A | 2603.0 | A | 0.0   |
| 108 | A2 | 195.9 | I | 0.0    | A | 0.1   |
| 109 | B1 | 197.2 | A | 74.3   | A | 0.0   |
| 110 | B2 | 197.6 | A | 22.1   | A | 0.0   |
| 111 | B2 | 199.3 | A | 0.0    | A | 200.7 |
| 112 | A1 | 199.6 | A | 2158.8 | A | 0.4   |
| 113 | B1 | 203.5 | A | 0.5    | A | 211.0 |
| 114 | B2 | 205.2 | A | 0.0    | A | 79.7  |
| 115 | A2 | 205.6 | I | 0.0    | A | 0.0   |
| 116 | A1 | 207.2 | A | 1.5    | A | 321.6 |
| 117 | B2 | 209.0 | A | 8.0    | A | 0.0   |
| 118 | B1 | 209.5 | A | 1141.5 | A | 0.0   |
| 119 | B2 | 211.8 | A | 36.8   | A | 0.0   |
| 120 | A2 | 213.3 | I | 0.0    | A | 21.1  |
| 121 | A1 | 214.0 | A | 5.4    | A | 244.2 |
| 122 | A2 | 214.3 | I | 0.0    | A | 0.2   |
| 123 | A1 | 216.7 | A | 9.2    | A | 367.3 |
| 124 | B1 | 218.2 | A | 0.0    | A | 30.3  |
| 125 | A1 | 218.9 | A | 1093.2 | A | 4.9   |

---

|     |    |       |   |        |   |       |
|-----|----|-------|---|--------|---|-------|
| 126 | B1 | 219.5 | A | 2284.1 | A | 0.0   |
| 127 | B2 | 220.3 | A | 0.0    | A | 78.3  |
| 128 | A2 | 220.6 | I | 0.0    | A | 0.0   |
| 129 | B2 | 221.4 | A | 40.7   | A | 0.1   |
| 130 | A1 | 221.6 | A | 27.4   | A | 342.5 |
| 131 | A1 | 222.7 | A | 3406.5 | A | 6.0   |
| 132 | A2 | 223.8 | I | 0.0    | A | 26.4  |
| 133 | B1 | 225.6 | A | 0.0    | A | 212.1 |
| 134 | A2 | 226.3 | I | 0.0    | A | 32.4  |
| 135 | A2 | 226.9 | I | 0.0    | A | 0.0   |
| 136 | B1 | 231.3 | A | 171.1  | A | 0.0   |
| 137 | B2 | 231.3 | A | 45.7   | A | 0.0   |
| 138 | B2 | 234.0 | A | 0.0    | A | 514.2 |
| 139 | A1 | 234.3 | A | 336.8  | A | 0.1   |
| 140 | B1 | 238.5 | A | 0.0    | A | 243.8 |
| 141 | A1 | 241.6 | A | 3.0    | A | 0.0   |
| 142 | B1 | 244.1 | A | 0.0    | A | 1.6   |
| 143 | A2 | 245.0 | I | 0.0    | A | 0.0   |
| 144 | B2 | 245.9 | A | 0.0    | A | 28.0  |
| 145 | B1 | 249.2 | A | 17.8   | A | 0.0   |
| 146 | A1 | 251.0 | A | 32.9   | A | 53.0  |
| 147 | A1 | 252.8 | A | 6018.1 | A | 12.9  |
| 148 | A2 | 253.2 | I | 0.0    | A | 8.2   |
| 149 | B1 | 253.4 | A | 26.0   | A | 0.0   |
| 150 | A2 | 253.5 | I | 0.0    | A | 3.4   |
| 151 | A1 | 254.2 | A | 428.9  | A | 131.4 |

---

|     |    |       |   |        |   |       |
|-----|----|-------|---|--------|---|-------|
| 152 | B2 | 254.3 | A | 6.3    | A | 0.0   |
| 153 | B1 | 256.2 | A | 0.0    | A | 50.3  |
| 154 | B2 | 258.0 | A | 0.0    | A | 135.5 |
| 155 | B2 | 266.8 | A | 23.7   | A | 0.0   |
| 156 | A2 | 267.4 | I | 0.0    | A | 39.3  |
| 157 | A2 | 269.7 | I | 0.0    | A | 0.0   |
| 158 | A1 | 271.1 | A | 28.6   | A | 0.3   |
| 159 | B2 | 271.1 | A | 0.0    | A | 9.0   |
| 160 | B1 | 272.0 | A | 1.2    | A | 17.0  |
| 161 | A1 | 273.8 | A | 0.0    | A | 67.7  |
| 162 | A2 | 273.9 | I | 0.0    | A | 30.3  |
| 163 | B1 | 274.6 | A | 990.1  | A | 0.0   |
| 164 | B2 | 275.0 | A | 1.3    | A | 0.0   |
| 165 | A2 | 277.2 | I | 0.0    | A | 0.0   |
| 166 | B2 | 277.3 | A | 0.0    | A | 0.7   |
| 167 | B1 | 278.4 | A | 1.9    | A | 94.5  |
| 168 | A1 | 278.4 | A | 71.5   | A | 0.1   |
| 169 | A1 | 279.1 | A | 1.6    | A | 624.0 |
| 170 | B1 | 279.9 | A | 8142.4 | A | 0.0   |
| 171 | B2 | 287.2 | A | 1.2    | A | 0.0   |
| 172 | A2 | 287.6 | I | 0.0    | A | 40.9  |
| 173 | A2 | 295.4 | I | 0.0    | A | 0.0   |
| 174 | A1 | 297.5 | A | 0.0    | A | 0.0   |
| 175 | B2 | 298.0 | A | 0.0    | A | 1.1   |
| 176 | B1 | 300.2 | A | 0.0    | A | 40.7  |
| 177 | A1 | 303.9 | A | 0.1    | A | 67.7  |

---

|     |    |       |   |        |   |       |
|-----|----|-------|---|--------|---|-------|
| 178 | B1 | 306.2 | A | 3781.5 | A | 0.0   |
| 179 | B2 | 306.6 | A | 169.9  | A | 0.0   |
| 180 | A2 | 306.8 | I | 0.0    | A | 8.3   |
| 181 | B1 | 316.5 | A | 16.2   | A | 0.0   |
| 182 | A1 | 317.3 | A | 0.1    | A | 211.5 |
| 183 | B2 | 317.8 | A | 31.9   | A | 0.0   |
| 184 | A2 | 318.3 | I | 0.0    | A | 66.9  |
| 185 | B2 | 320.8 | A | 60.5   | A | 0.0   |
| 186 | B1 | 320.8 | A | 229.9  | A | 0.0   |
| 187 | A1 | 322.8 | A | 0.4    | A | 112.0 |
| 188 | A2 | 323.1 | I | 0.0    | A | 0.0   |
| 189 | B2 | 323.7 | A | 0.0    | A | 0.8   |
| 190 | A2 | 324.0 | I | 0.0    | A | 23.1  |
| 191 | A1 | 324.4 | A | 0.1    | A | 0.1   |
| 192 | B1 | 325.0 | A | 0.0    | A | 31.6  |
| 193 | B1 | 330.3 | A | 1161.4 | A | 0.0   |
| 194 | A1 | 330.7 | A | 0.0    | A | 52.7  |
| 195 | B2 | 333.0 | A | 7.8    | A | 0.0   |
| 196 | A2 | 333.2 | I | 0.0    | A | 10.6  |
| 197 | A1 | 345.8 | A | 0.0    | A | 33.2  |
| 198 | B1 | 346.3 | A | 277.2  | A | 0.0   |
| 199 | A2 | 346.4 | I | 0.0    | A | 7.0   |
| 200 | B2 | 346.7 | A | 31.3   | A | 0.0   |
| 201 | B2 | 363.9 | A | 34.1   | A | 0.0   |
| 202 | A2 | 364.1 | I | 0.0    | A | 0.2   |
| 203 | A1 | 364.9 | A | 0.0    | A | 67.5  |

---

|     |    |       |   |       |   |       |
|-----|----|-------|---|-------|---|-------|
| 204 | B1 | 365.1 | A | 288.9 | A | 0.0   |
| 205 | A1 | 386.0 | A | 0.0   | A | 12.1  |
| 206 | B1 | 386.2 | A | 157.4 | A | 0.0   |
| 207 | A1 | 389.1 | A | 114.3 | A | 0.0   |
| 208 | A2 | 390.8 | I | 0.0   | A | 0.0   |
| 209 | B1 | 391.3 | A | 0.0   | A | 5.9   |
| 210 | B2 | 392.9 | A | 0.0   | A | 0.6   |
| 211 | B2 | 395.2 | A | 193.3 | A | 0.0   |
| 212 | A2 | 395.4 | I | 0.0   | A | 2.5   |
| 213 | B2 | 397.7 | A | 142.2 | A | 0.0   |
| 214 | B1 | 399.1 | A | 69.3  | A | 0.0   |
| 215 | A2 | 399.1 | I | 0.0   | A | 3.3   |
| 216 | A1 | 399.5 | A | 0.0   | A | 55.5  |
| 217 | B2 | 409.9 | A | 629.3 | A | 0.0   |
| 218 | A1 | 412.4 | A | 41.5  | A | 1.3   |
| 219 | A1 | 412.5 | A | 0.5   | A | 513.6 |
| 220 | B1 | 412.6 | A | 35.8  | A | 0.1   |
| 221 | B1 | 412.9 | A | 0.1   | A | 72.8  |
| 222 | A2 | 413.2 | I | 0.0   | A | 0.0   |
| 223 | B2 | 413.6 | A | 0.0   | A | 1.5   |
| 224 | A2 | 414.9 | I | 0.0   | A | 41.6  |
| 225 | A1 | 444.9 | A | 0.5   | A | 66.6  |
| 226 | B1 | 445.0 | A | 22.3  | A | 0.0   |
| 227 | B2 | 448.1 | A | 24.8  | A | 0.0   |
| 228 | A2 | 448.1 | I | 0.0   | A | 1.4   |
| 229 | A2 | 452.5 | I | 0.0   | A | 0.0   |

---



|     |    |       |   |         |   |       |
|-----|----|-------|---|---------|---|-------|
| 230 | A1 | 453.4 | A | 6908.8  | A | 0.0   |
| 231 | B2 | 455.8 | A | 0.0     | A | 13.3  |
| 232 | B1 | 456.6 | A | 0.0     | A | 4.9   |
| 233 | B2 | 470.9 | A | 1226.9  | A | 0.0   |
| 234 | B1 | 472.5 | A | 144.5   | A | 0.0   |
| 235 | A1 | 472.7 | A | 0.0     | A | 61.0  |
| 236 | A2 | 476.1 | I | 0.0     | A | 13.4  |
| 237 | B2 | 482.7 | A | 543.0   | A | 0.0   |
| 238 | B1 | 487.5 | A | 290.5   | A | 0.0   |
| 239 | A2 | 488.1 | I | 0.0     | A | 2.9   |
| 240 | A1 | 488.1 | A | 0.6     | A | 62.6  |
| 241 | A2 | 506.8 | I | 0.0     | A | 0.0   |
| 242 | B2 | 507.2 | A | 0.0     | A | 0.0   |
| 243 | A1 | 508.6 | A | 1826.6  | A | 0.0   |
| 244 | B1 | 509.0 | A | 0.0     | A | 29.2  |
| 245 | A1 | 517.8 | A | 15354.2 | A | 0.0   |
| 246 | A2 | 518.4 | I | 0.0     | A | 0.0   |
| 247 | B1 | 525.2 | A | 0.3     | A | 102.6 |
| 248 | B2 | 525.8 | A | 0.1     | A | 17.4  |
| 249 | B2 | 540.2 | A | 3105.1  | A | 0.3   |
| 250 | A2 | 546.6 | I | 0.0     | A | 0.0   |
| 251 | A1 | 547.2 | A | 10157.3 | A | 7.1   |
| 252 | B2 | 547.2 | A | 7.7     | A | 167.8 |
| 253 | B1 | 547.8 | A | 44.7    | A | 2.8   |
| 254 | A1 | 549.9 | A | 168.0   | A | 321.7 |
| 255 | B1 | 550.6 | A | 2543.5  | A | 0.0   |

---

|     |    |       |   |         |   |       |
|-----|----|-------|---|---------|---|-------|
| 256 | A2 | 554.8 | I | 0.0     | A | 0.2   |
| 257 | A1 | 560.2 | A | 3.0     | A | 594.4 |
| 258 | A2 | 560.8 | I | 0.0     | A | 30.1  |
| 259 | B1 | 568.0 | A | 876.1   | A | 0.0   |
| 260 | B2 | 569.1 | A | 44.5    | A | 0.0   |
| 261 | A1 | 570.3 | A | 0.6     | A | 88.2  |
| 262 | B2 | 570.8 | A | 547.4   | A | 0.0   |
| 263 | B1 | 572.2 | A | 3440.3  | A | 0.0   |
| 264 | A2 | 574.2 | I | 0.0     | A | 3.5   |
| 265 | A1 | 591.8 | A | 634.0   | A | 0.4   |
| 266 | B1 | 593.1 | A | 0.0     | A | 20.4  |
| 267 | A2 | 595.0 | I | 0.0     | A | 0.0   |
| 268 | B2 | 595.8 | A | 1644.1  | A | 0.2   |
| 269 | B2 | 596.3 | A | 89.7    | A | 5.0   |
| 270 | A2 | 599.6 | I | 0.0     | A | 0.0   |
| 271 | B2 | 599.7 | A | 3.0     | A | 0.3   |
| 272 | A1 | 602.3 | A | 949.4   | A | 1.0   |
| 273 | B1 | 602.5 | A | 0.6     | A | 11.7  |
| 274 | A1 | 609.7 | A | 0.2     | A | 565.2 |
| 275 | A2 | 609.9 | I | 0.0     | A | 29.1  |
| 276 | B1 | 610.8 | A | 2137.3  | A | 0.0   |
| 277 | A1 | 621.6 | A | 0.2     | A | 320.9 |
| 278 | B1 | 623.5 | A | 15466.5 | A | 0.0   |
| 279 | A2 | 632.1 | I | 0.0     | A | 46.6  |
| 280 | B2 | 632.4 | A | 122.5   | A | 0.0   |
| 281 | A2 | 636.9 | I | 0.0     | A | 0.0   |

---

|     |    |       |   |        |   |       |
|-----|----|-------|---|--------|---|-------|
| 282 | A1 | 637.0 | A | 262.7  | A | 0.1   |
| 283 | B1 | 638.4 | A | 0.8    | A | 32.4  |
| 284 | B2 | 638.5 | A | 0.4    | A | 133.1 |
| 285 | A1 | 668.3 | A | 0.2    | A | 625.3 |
| 286 | B2 | 669.6 | A | 460.8  | A | 0.0   |
| 287 | B1 | 669.8 | A | 2001.3 | A | 0.0   |
| 288 | A2 | 670.6 | I | 0.0    | A | 75.8  |
| 289 | A1 | 675.5 | A | 384.1  | A | 0.0   |
| 290 | B1 | 675.8 | A | 0.1    | A | 39.6  |
| 291 | A2 | 675.9 | I | 0.0    | A | 0.0   |
| 292 | B2 | 676.2 | A | 0.3    | A | 32.0  |
| 293 | B2 | 722.8 | A | 5307.6 | A | 0.0   |
| 294 | A1 | 754.4 | A | 0.0    | A | 84.3  |
| 295 | A2 | 754.4 | I | 0.0    | A | 7.6   |
| 296 | B1 | 756.5 | A | 0.6    | A | 0.0   |
| 297 | B1 | 806.7 | A | 0.0    | A | 0.3   |
| 298 | A1 | 806.7 | A | 1443.4 | A | 0.0   |
| 299 | B2 | 834.0 | A | 0.1    | A | 2.9   |
| 300 | A2 | 834.0 | I | 0.0    | A | 0.0   |
| 301 | B2 | 851.5 | A | 4074.1 | A | 0.0   |
| 302 | A1 | 868.0 | A | 0.0    | A | 964.5 |
| 303 | B1 | 868.1 | A | 2126.4 | A | 0.0   |
| 304 | A2 | 868.3 | I | 0.0    | A | 77.9  |
| 305 | B2 | 897.5 | A | 4469.6 | A | 0.0   |
| 306 | A2 | 914.8 | I | 0.0    | A | 0.0   |
| 307 | B2 | 914.9 | A | 0.8    | A | 6.8   |

---

|     |    |       |   |        |   |        |
|-----|----|-------|---|--------|---|--------|
| 308 | A1 | 919.3 | A | 603.0  | A | 110.0  |
| 309 | B1 | 919.4 | A | 39.4   | A | 0.1    |
| 310 | B1 | 920.2 | A | 199.6  | A | 0.0    |
| 311 | A1 | 920.4 | A | 94.4   | A | 1000.0 |
| 312 | A1 | 921.3 | A | 112.6  | A | 28.9   |
| 313 | B1 | 921.4 | A | 1.1    | A | 16.9   |
| 314 | A2 | 921.6 | I | 0.0    | A | 0.0    |
| 315 | B2 | 921.7 | A | 0.1    | A | 1.4    |
| 316 | A1 | 926.2 | A | 0.0    | A | 638.2  |
| 317 | A2 | 926.5 | I | 0.0    | A | 0.2    |
| 318 | B1 | 943.3 | A | 2551.3 | A | 0.0    |
| 319 | B2 | 944.5 | A | 11.8   | A | 0.0    |
| 320 | A2 | 947.5 | I | 0.0    | A | 37.0   |
| 321 | A1 | 950.8 | A | 0.0    | A | 77.2   |
| 322 | A2 | 950.9 | I | 0.0    | A | 6.0    |
| 323 | B2 | 970.9 | A | 421.8  | A | 0.0    |
| 324 | B1 | 980.5 | A | 38.4   | A | 0.0    |

---

## 8 Coordinates of calculated $K_4Nb_6O_{17}$ unit cell

Table 4: Structural data of  $K_4Nb_6O_{17}$  unit cell calculated at the B3LYP-D3 level.

---

DIRECT LATTICE VECTORS CARTESIAN COMPONENTS (ANGSTROM)

| X                  | Y                  | Z                  |
|--------------------|--------------------|--------------------|
| 0.781855666519E+01 | 0.000000000000E+00 | 0.000000000000E+00 |
| 0.000000000000E+00 | 0.324111644324E+02 | 0.000000000000E+00 |
| 0.000000000000E+00 | 0.000000000000E+00 | 0.650530671342E+01 |

ATOMS IN THE ASYMMETRIC UNIT 27 - ATOMS IN THE UNIT CELL: 108

| ATOM    | X/A                 | Y/B                 | Z/C                 |
|---------|---------------------|---------------------|---------------------|
| 1 T NB  | 6.413648160130E-03  | 1.765233823406E-01  | 1.908034262838E-01  |
| 2 F NB  | -4.935863518405E-01 | -1.765233823406E-01 | -1.908034262838E-01 |
| 3 F NB  | -4.935863518405E-01 | 3.234766176594E-01  | -3.091965737177E-01 |
| 4 F NB  | 6.413648160130E-03  | -3.234766176594E-01 | 3.091965737147E-01  |
| 5 T NB  | 9.342215635856E-03  | -1.765240329212E-01 | -1.908015419020E-01 |
| 6 F NB  | -4.906577843648E-01 | 1.765240329212E-01  | 1.908015419020E-01  |
| 7 F NB  | -4.906577843648E-01 | -3.234759670788E-01 | 3.091984580964E-01  |
| 8 F NB  | 9.342215635856E-03  | 3.234759670788E-01  | -3.091984580995E-01 |
| 9 T NB  | 1.228541552380E-03  | 1.256555959783E-01  | -2.486633579133E-01 |
| 10 F NB | -4.987714584483E-01 | -1.256555959783E-01 | 2.486633579133E-01  |
| 11 F NB | -4.987714584483E-01 | 3.743444040217E-01  | 2.513366420851E-01  |
| 12 F NB | 1.228541552380E-03  | -3.743444040217E-01 | -2.513366420882E-01 |
| 13 T NB | 1.451298347027E-02  | -1.256580347912E-01 | 2.486678889944E-01  |
| 14 F NB | -4.854870165304E-01 | 1.256580347912E-01  | -2.486678889944E-01 |
| 15 F NB | -4.854870165304E-01 | -3.743419652088E-01 | -2.513321110071E-01 |
| 16 F NB | 1.451298347027E-02  | 3.743419652088E-01  | 2.513321110040E-01  |
| 17 T NB | 2.578836106634E-01  | 9.381138493390E-02  | 1.332153165826E-01  |

18 F NB -2.421163893372E-01 -9.381138493390E-02 -1.332153165826E-01  
19 F NB -2.421163893372E-01 4.061886150661E-01 -3.667846834189E-01  
20 F NB 2.578836106634E-01 -4.061886150661E-01 3.667846834158E-01  
21 T NB 2.578884829482E-01 4.616556790712E-02 -3.240124889831E-01  
22 F NB -2.421115170525E-01 -4.616556790712E-02 3.240124889831E-01  
23 F NB -2.421115170525E-01 4.538344320929E-01 1.759875110154E-01  
24 F NB 2.578884829482E-01 -4.538344320929E-01 -1.759875110184E-01  
25 T K 2.578570229634E-01 2.187800875334E-01 -3.674443898255E-01  
26 F K -2.421429770372E-01 -2.187800875334E-01 3.674443898255E-01  
27 F K -2.421429770372E-01 2.812199124666E-01 1.325556101729E-01  
28 F K 2.578570229634E-01 -2.812199124666E-01 -1.325556101760E-01  
29 T K -2.421540887855E-01 2.166737437386E-01 -3.731026594541E-01  
30 F K 2.578459112139E-01 -2.166737437386E-01 3.731026594541E-01  
31 F K 2.578459112139E-01 2.833262562614E-01 1.268973405444E-01  
32 F K -2.421540887855E-01 -2.833262562614E-01 -1.268973405474E-01  
33 T K -2.421176703690E-01 8.614476016376E-02 3.276878113775E-01  
34 F K 2.578823296304E-01 -8.614476016376E-02 -3.276878113775E-01  
35 F K 2.578823296304E-01 4.138552398362E-01 -1.723121886240E-01  
36 F K -2.421176703690E-01 -4.138552398362E-01 1.723121886209E-01  
37 T K -2.421129047434E-01 2.169572340243E-02 -2.101428551475E-01  
38 F K 2.578870952560E-01 -2.169572340243E-02 2.101428551475E-01  
39 F K 2.578870952560E-01 4.783042765976E-01 2.898571448510E-01  
40 F K -2.421129047434E-01 -4.783042765976E-01 -2.898571448540E-01  
41 T O 3.275617877284E-02 2.281445850716E-01 2.793646934058E-01  
42 F O -4.672438212278E-01 -2.281445850716E-01 -2.793646934058E-01  
43 F O -4.672438212278E-01 2.718554149284E-01 -2.206353065957E-01  
44 F O 3.275617877284E-02 -2.718554149284E-01 2.206353065927E-01  
45 T O 4.830052768448E-01 2.281444697713E-01 2.793751767393E-01  
46 F O -1.699472315584E-02 -2.281444697713E-01 -2.793751767393E-01

47 F 0 -1.699472315584E-02 2.718555302287E-01 -2.206248232622E-01  
48 F 0 4.830052768448E-01 -2.718555302287E-01 2.206248232592E-01  
49 T 0 6.109690572274E-04 1.498383067148E-01 4.945770147313E-01  
50 F 0 -4.993890309434E-01 -1.498383067148E-01 -4.945770147313E-01  
51 F 0 -4.993890309434E-01 3.501616932852E-01 -5.422985270225E-03  
52 F 0 6.109690572274E-04 -3.501616932852E-01 5.422985267198E-03  
53 T 0 -4.848398219874E-01 1.498376118254E-01 4.945677793360E-01  
54 F 0 1.516017801199E-02 -1.498376118254E-01 -4.945677793360E-01  
55 F 0 1.516017801199E-02 3.501623881746E-01 -5.432220665527E-03  
56 F 0 -4.848398219874E-01 -3.501623881746E-01 5.432220662499E-03  
57 T 0 1.850964109717E-02 6.648820392592E-02 -3.218391139773E-01  
58 F 0 -4.814903589035E-01 -6.648820392592E-02 3.218391139773E-01  
59 F 0 -4.814903589035E-01 4.335117960741E-01 1.781608860212E-01  
60 F 0 1.850964109717E-02 -4.335117960741E-01 -1.781608860242E-01  
61 T 0 4.972683041527E-01 6.648841403467E-02 -3.218313616461E-01  
62 F 0 -2.731695847895E-03 -6.648841403467E-02 3.218313616461E-01  
63 F 0 -2.731695847895E-03 4.335115859653E-01 1.781686383524E-01  
64 F 0 4.972683041527E-01 -4.335115859653E-01 -1.781686383554E-01  
65 T 0 1.276970529845E-02 1.813266886861E-01 -1.056525316203E-01  
66 F 0 -4.872302947022E-01 -1.813266886861E-01 1.056525316203E-01  
67 F 0 -4.872302947022E-01 3.186733113139E-01 3.943474683782E-01  
68 F 0 1.276970529845E-02 -3.186733113139E-01 -3.943474683812E-01  
69 T 0 -4.969943088594E-01 1.813304460781E-01 -1.056577470388E-01  
70 F 0 3.005691139961E-03 -1.813304460781E-01 1.056577470388E-01  
71 F 0 3.005691139961E-03 3.186695539219E-01 3.943422529597E-01  
72 F 0 -4.969943088594E-01 -3.186695539219E-01 -3.943422529628E-01  
73 T 0 1.906089783968E-02 1.082965851999E-01 8.082659483336E-02  
74 F 0 -4.809391021610E-01 -1.082965851999E-01 -8.082659483336E-02  
75 F 0 -4.809391021610E-01 3.917034148001E-01 -4.191734051682E-01

76 F 0 1.906089783968E-02 -3.917034148001E-01 4.191734051651E-01  
77 T 0 4.967044180655E-01 1.082994357335E-01 8.082580663163E-02  
78 F 0 -3.295581935087E-03 -1.082994357335E-01 -8.082580663163E-02  
79 F 0 -3.295581935087E-03 3.917005642665E-01 -4.191741933699E-01  
80 F 0 4.967044180655E-01 -3.917005642665E-01 4.191741933669E-01  
81 T 0 2.578859756020E-01 1.187784500247E-01 -2.059604439812E-01  
82 F 0 -2.421140243987E-01 -1.187784500247E-01 2.059604439812E-01  
83 F 0 -2.421140243987E-01 3.812215499753E-01 2.940395560173E-01  
84 F 0 2.578859756020E-01 -3.812215499753E-01 -2.940395560203E-01  
85 T 0 -2.421177277641E-01 1.187485466855E-01 -2.181889590262E-01  
86 F 0 2.578822722353E-01 -1.187485466855E-01 2.181889590262E-01  
87 F 0 2.578822722353E-01 3.812514533145E-01 2.818110409723E-01  
88 F 0 -2.421177277641E-01 -3.812514533145E-01 -2.818110409753E-01  
89 T 0 2.578898031144E-01 4.270096052167E-02 -2.032175487445E-02  
90 F 0 -2.421101968862E-01 -4.270096052167E-02 2.032175487445E-02  
91 F 0 -2.421101968862E-01 4.572990394783E-01 4.796782451240E-01  
92 F 0 2.578898031144E-01 -4.572990394783E-01 -4.796782451271E-01  
93 T 0 -2.421203348312E-01 1.717425749826E-01 2.135402313228E-01  
94 F 0 2.578796651681E-01 -1.717425749826E-01 -2.135402313228E-01  
95 F 0 2.578796651681E-01 3.282574250174E-01 -2.864597686787E-01  
96 F 0 -2.421203348312E-01 -3.282574250174E-01 2.864597686757E-01  
97 T 0 2.578833191399E-01 1.581589353898E-01 2.129864737945E-01  
98 F 0 -2.421166808607E-01 -1.581589353898E-01 -2.129864737945E-01  
99 F 0 -2.421166808607E-01 3.418410646102E-01 -2.870135262070E-01  
100 F 0 2.578833191399E-01 -3.418410646102E-01 2.870135262040E-01  
101 T 0 2.578873115678E-01 -7.266795307648E-03 -3.776377462822E-01  
102 F 0 -2.421126884328E-01 7.266795307648E-03 3.776377462822E-01  
103 F 0 -2.421126884328E-01 -4.927332046924E-01 1.223622537163E-01  
104 F 0 2.578873115678E-01 4.927332046924E-01 -1.223622537193E-01



|     |   |   |                     |                     |                     |
|-----|---|---|---------------------|---------------------|---------------------|
| 105 | T | 0 | 2.578985513938E-01  | 6.743342869883E-02  | 3.803692973295E-01  |
| 106 | F | 0 | -2.421014486069E-01 | -6.743342869883E-02 | -3.803692973295E-01 |
| 107 | F | 0 | -2.421014486069E-01 | 4.325665713012E-01  | -1.196307026720E-01 |
| 108 | F | 0 | 2.578985513938E-01  | -4.325665713012E-01 | 1.196307026690E-01  |

---
